# Supplementary material
Source: PubMed Central journal article supplement (PMC7479969)
Supplement: NIHMS1621560-supplement-supporting_material.pdf [file NIHMS1621560-supplement-supporting_material.pdf]

## Supporting Information

### Low Initial Modulus Biodegradable Polyurethane Elastomers for Soft Tissue Regeneration

*Cancan Xu<sup>†,‡</sup>, Yihui Huang<sup>†,‡</sup>, Liping Tang<sup>†,‡</sup>, Yi Hong<sup>\*†,‡</sup>*

<sup>†</sup>Department of Bioengineering, University of Texas at Arlington, Arlington, TX 76019, USA

<sup>‡</sup>Joint Biomedical Engineering Program, University of Texas Southwestern Medical Center,  
Dallas, TX 75093, USA

**\*Corresponding author:** Yi Hong, [yihong@uta.edu](mailto:yihong@uta.edu), Tel: +1-817-272-0562; Fax: +1-817-272-2251.

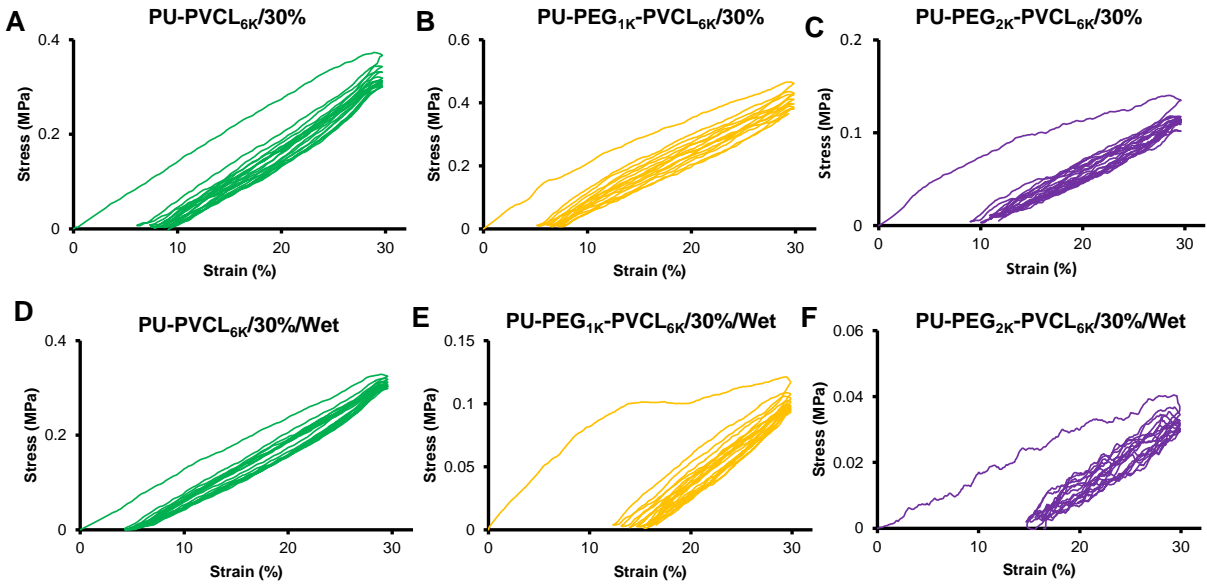

**Figure S1.** Cyclic stretching curves of PU-PVCL<sub>6K</sub>, PU-PEG<sub>1K</sub>-PVCL<sub>6K</sub> and PU-PEG<sub>2K</sub>-PVCL<sub>6K</sub> porous scaffolds at 30% deformation in (A-C) dry and (D-F) wet states.
